# Supplementary material for: Genome-wide association study reveals the advantaged genes regulating japonica rice grain shape traits in northern China
Source: PeerJ. 2024 Dec 18;12:e18746. doi: 10.7717/peerj.18746 (PMC11662900; doi:10.7717/peerj.18746)
Supplement: Supplemental Information 2 [file peerj-12-18746-s002.xlsx]

## Sheet: Table S1
			Sample Code	Variety Name	PC value			Traits
					PC1	PC2	PC3	GR	GL	GW	BA	BR	BL	BW	WA	WR	WL	WW
			Sample1	YAN GENG 752	-9.99311	-6.82944	0.160201	2.4	6.9615	2.9155	10.574	1.952	4.993	2.563	9.541	1.937	4.791	2.481
			Sample2	JIN DAO XIANG 103	-10.6975	11.5121	24.3	2.298	7.283	3.1835	12.553	1.869	5.348	2.867	10.774	1.834	5.002	2.734
			Sample3	LIAO GENG 2501	-16.7041	11.832	27.8115	2.2485	7.235	3.289	12.952	1.773	5.264	2.975	11.171	1.776	4.989	2.82
			Sample4	LONG GENG 852	-4.71274	-15.8198	30.4972	2.551	7.609	3.0105	12.556	1.969	5.471	2.78	10.904	1.962	5.15	2.636
			Sample5	LIAO GENG 419	-35.8951	-45.4276	7.82744	2.502	7.385	2.9745	11.644	1.999	5.28	2.646	10.017	1.952	4.922	2.529
			Sample6	LIAO GENG 1499	-35.3188	-44.677	8.62312	2.437	7.28	3	11.223	2.001	5.182	2.595	10.034	1.941	4.905	2.535
			Sample7	LIAO GENG 1305	-37.8818	-34.4755	17.6704	2.5925	7.215	2.822	11.05	2.022	5.193	2.572	9.675	2.008	4.892	2.444
			Sample8	YAN GENG 237	-10.7087	-30.956	-9.98842	2.582	7.776	3.031	13.321	2.081	5.768	2.774	10.88	1.966	5.234	2.674
			Sample9	LIAO GENG 401	-37.7134	-34.5044	17.5783	2.576	7.3215	2.8845	11.853	2.006	5.343	2.666	10.165	2.015	5.043	2.513
			Sample10	YAN GENG 50	-6.82541	-29.9654	-10.5574	2.7435	7.6915	2.9115	13.348	2.131	5.848	2.746	10.752	1.909	5.093	2.669
			Sample11	LIAO GENG 1495	-18.5365	8.74649	-37.9597	2.3425	6.986	2.9865	11.383	1.983	5.234	2.643	9.669	1.957	4.886	2.511
			Sample12	LIAO GENG 337	16.1771	-2.65985	-31.5843	2.572	7.5465	2.885	NaN	NaN	NaN	NaN	NaN	NaN	NaN	NaN
			Sample13	LIAO GENG 433	-3.0548	-4.64544	32.1994	2.4025	7.2575	3.0935	11.449	1.837	5.028	2.725	9.462	1.818	4.713	2.599
			Sample14	LIAO GENG 237	-35.3214	-44.6161	8.55603	2.4315	7.186	2.988	11.416	1.978	5.233	2.653	10.04	1.927	4.909	2.56
			Sample15	LIAO GENG 132	-35.1512	-44.4632	8.54339	2.4595	7.2275	2.9665	11.297	1.957	5.137	2.633	10.112	1.909	4.888	2.572
			Sample16	DONG ZHUANG 1018	-58.569	40.1048	-1.96842	2.0995	6.918	3.328	12.019	1.687	4.942	2.935	9.987	1.641	4.617	2.822
			Sample17	FU TIAN 2100	-35.7566	-45.1064	7.84934	2.4005	7.0955	2.999	NaN	NaN	NaN	NaN	NaN	NaN	NaN	NaN
			Sample18	FU GENG 357	-6.51697	-36.8524	-27.1793	2.557	7.2845	2.901	11.057	2.032	5.208	2.553	9.764	1.986	4.962	2.505
			Sample19	MEI FENG 9HAO	12.8053	-12.2383	-6.6574	2.3055	7.231	3.1735	12.229	1.825	5.197	2.852	NaN	NaN	NaN	NaN
			Sample20	XIN YU 3HAO	20.5534	4.08124	6.62853	2.253	7.061	3.1375	11.729	1.833	5.12	2.799	10.089	1.816	4.837	2.673
			Sample21	TIE GENG 10HAO	25.7637	9.56691	2.4881	2.199	7.274	3.3365	12.495	1.674	5.078	3.039	10.734	1.662	4.756	2.873
			Sample22	FU GENG 9HAO	25.5927	0.81166	-4.58898	2.206	7.0125	3.197	12.296	1.775	5.125	2.891	10.333	1.75	4.761	2.731
			Sample23	ZHUANG YAN 6HAO	23.1675	-2.50683	-25.1554	2.1755	6.901	3.2385	12.454	1.693	5.045	2.985	10.642	1.661	4.711	2.843
			Sample24	LIAO XING 21HAO	-35.1809	-44.62	8.65171	2.3955	7.0705	2.976	11.205	1.923	5.104	2.66	9.862	1.893	4.803	2.55
			Sample25	GANG YUAN 8HAO	28.7495	9.10296	27.1902	2.201	7.007	3.221	12.221	1.744	5.076	2.915	10.822	1.711	4.802	2.813
			Sample26	CHEN HONG 36	-10.1337	-28.5299	-38.5849	2.429	7.3085	3.0745	12.338	1.91	5.329	2.791	11.02	1.896	5.081	2.684
			Sample27	YING 9207	21.8734	-0.366619	-3.64098	2.2075	7.0745	3.2305	12.332	1.775	5.149	2.904	10.494	1.76	4.821	2.749
			Sample28	LIAO XING 19HAO	-3.3001	-3.84114	36.353	2.507	7.318	2.935	11.475	1.974	5.266	2.67	9.811	1.942	4.888	2.528
			Sample29	YING DAO 1	-7.68684	-27.5892	-41.4222	2.4005	7.0955	2.999	11.675	1.87	5.13	2.748	10.084	1.819	4.81	2.655
			Sample30	TIE GENG 9HAO	8.2253	8.21179	-31.6778	2.195	6.8135	3.1265	11.369	1.698	4.858	2.869	9.265	1.678	4.515	2.698
			Sample31	FU HE 998	-42.1679	27.876	-35.1249	2.3745	7.6385	3.2325	12.93	1.886	5.422	2.881	10.773	1.848	5.044	2.736
			Sample32	LIAO XING 20HAO	28.753	9.10103	27.154	2.2165	6.8725	3.179	11.806	1.757	5.011	2.856	10.4	1.723	4.752	2.766
			Sample33	LIAO XING 16HAO	27.8386	10.4331	26.7209	2.3465	7.1355	3.0925	11.391	1.879	5.135	2.737	9.76	1.82	4.789	2.636
			Sample34	LIAO XING 13HAO	4.78747	-20.3211	-0.98221	2.256	7.0865	3.2005	11.958	1.781	5.072	2.852	10.201	1.727	4.754	2.762
			Sample35	FU GENG 8	9.71241	-35.5616	-34.4314	2.353	7.089	3.0275	11.607	1.878	5.138	2.74	9.426	1.842	4.721	2.57
			Sample36	FU HE 80	-11.2228	7.66717	26.5392	2.6725	7.907	3.031	12.832	1.987	5.514	2.755	11.032	2.011	5.292	2.646
			Sample37	SHEN GENG 4311	1.12473	-0.923473	6.62499	2.568	7.903	3.096	13.154	2.168	5.845	2.698	11.776	2.126	5.564	2.622
			Sample38	LIAO HE NUO	21.2673	-9.26163	-42.1356	2.201	7.2955	3.362	NaN	NaN	NaN	NaN	NaN	NaN	NaN	NaN
			Sample39	LIAO XING 12HAO	27.9083	6.83872	7.04413	2.2605	7.381	3.3235	11.343	1.733	4.864	2.79	10.296	1.707	4.748	2.785
			Sample40	LIAO XING 14HAO	-16.2359	-1.1678	-8.59386	2.464	7.5525	3.085	12.7	2.016	5.535	2.725	10.857	2.053	5.276	2.585
			Sample41	LIAO XING 15HAO	-59.4712	42.6738	-4.5982	2.34	7.485	3.234	13.571	1.953	5.639	2.894	NaN	NaN	NaN	NaN
			Sample42	SHEN DAO 1HAO	28.7039	10.5106	26.6308	2.2175	7.0605	3.2055	11.934	1.786	5.043	2.826	10.358	1.75	4.762	2.728
			Sample43	QIAN ZHONG LANG 2HAO	-6.43525	-8.87843	14.1828	2.188	6.957	3.2565	11.933	1.719	4.981	2.905	10.263	1.699	4.687	2.77
			Sample44	SHEN NONG 2100	5.80911	1.20587	10.3053	2.3145	7.135	3.1155	11.3	1.811	4.957	2.724	10.076	1.779	4.73	2.665
			Sample45	LIAO XING 10HAO	20.2204	0.350174	25.6556	2.344	7.3625	3.1445	12.125	1.843	5.189	2.819	10.361	1.823	4.888	2.689
			Sample46	YAN GENG 188	24.3941	2.29418	3.0321	2.226	6.807	3.095	11.432	1.801	4.954	2.764	10.169	1.723	4.649	2.702
			Sample47	TIE GENG 8HAO	-35.3595	-44.6337	8.54048	2.445	7.1175	2.9465	11.185	1.884	5.045	2.681	9.99	1.875	4.819	2.582
			Sample48	FU HE 66	9.68659	7.49377	10.5788	2.6775	7.272	2.7425	10.447	2.165	5.175	2.394	8.874	2.126	4.846	2.292
			Sample49	SHEN DAO 8HAO	29.2906	10.8517	26.37	2.284	6.8995	3.0695	11.561	1.765	4.965	2.816	9.866	1.76	4.651	2.65
			Sample50	YUAN FENG 6HAO	-6.48371	-8.92267	14.2107	2.1915	6.9305	3.1805	11.511	1.724	4.885	2.84	9.936	1.683	4.591	2.735
			Sample51	LIAO XING 4HAO	-41.9929	6.81935	14.3005	2.744	7.7665	2.847	12.01	2.163	5.574	2.585	10.124	2.183	5.279	2.43
			Sample52	JIN YUAN 9540	-41.2188	44.3069	-7.20097	2.2055	7.051	3.224	12.273	1.8	5.171	2.881	10.583	1.801	4.922	2.753
			Sample53	LIAO XING 3HAO	2.32803	0.55315	9.7981	2.8245	7.335	2.6475	10.877	2.215	5.409	2.45	9.137	2.168	4.98	2.306
			Sample54	HUA GENG 8HAO	23.5744	2.71065	18.424	2.133	6.8675	3.2535	11.816	1.657	4.883	2.949	10.363	1.627	4.583	2.821
			Sample55	LIAO XING 7HAO	17.6623	1.25549	2.42587	2.173	7.1135	3.3025	11.639	1.718	4.916	2.868	10.329	1.677	4.661	2.793
			Sample56	LIAO XING 2HAO	29.122	9.18067	25.8427	2.145	6.987	3.2835	11.828	1.749	4.994	2.86	10.636	1.683	4.719	2.811
			Sample57	FU 218	26.3038	4.53708	-29.4315	2.18	7.137	3.275	11.818	1.733	5.01	2.898	10.541	1.773	5.094	2.905
			Sample58	FU GENG 5HAO	0.848468	18.2787	-41.2729	2.4535	7.3735	3.0355	12.311	1.966	5.369	2.738	10.481	1.948	5.037	2.598
			Sample59	FU HE 6HAO	-57.8372	40.6889	-3.40616	2.1175	7.0375	3.335	12.392	1.689	5.02	2.976	10.314	1.671	4.688	2.817
			Sample60	SHEN DAO 2HAO	-47.945	32.6722	-4.41573	2.06	6.6085	3.22	11.113	1.609	4.674	2.908	9.543	1.621	4.389	2.721
			Sample61	TIE GENG 7HAO	29.7348	9.52693	26.5561	2.1215	6.968	3.2935	12.051	1.728	4.999	2.895	10.64	1.686	4.738	2.817
			Sample62	SHEN NONG 606	27.3655	8.32457	1.52936	2.3015	7.3125	3.229	12.164	1.707	5.015	2.94	10.313	1.694	4.69	2.775
			Sample63	DAN GENG 12HAO	28.9242	12.005	15.1953	2.578	7.591	3.035	12.572	1.906	5.429	2.851	9.808	1.843	4.907	2.671
			Sample64	SHEN 988	26.8276	8.35703	-3.21549	2.2115	7.1605	3.273	12.192	1.696	5.014	2.96	10.457	1.695	4.729	2.802
			Sample65	TIE GENG 6HAO	16.9853	7.45739	-5.59724	2.2575	6.8455	3.1385	11.892	1.607	4.812	2.996	9.393	1.632	4.506	2.779
			Sample66	LIAO NONG 9911	29.1979	9.12399	25.9972	2.3375	6.9095	3.0845	11.719	1.663	4.893	2.949	9.468	1.646	4.496	2.742
			Sample67	DAN GENG 9HAO	19.2351	-5.006	-26.279	2.168	6.893	3.204	NaN	NaN	NaN	NaN	NaN	NaN	NaN	NaN
			Sample68	DAN HAN DAO 1HAO	18.8116	3.50784	-27.4259	1.9855	6.928	3.531	13.208	1.567	4.997	3.189	11.424	1.554	4.746	3.063
			Sample69	YAN FENG 47	29.3202	12.7557	18.0704	2.175	6.744	3.1785	11.552	1.681	4.858	2.899	10.216	1.64	4.573	2.799
			Sample70	LIAO GENG 30	2.34151	-5.53362	-2.07034	2.3375	7.034	3.039	11.299	1.836	5.002	2.727	9.367	1.807	4.643	2.576
			Sample71	FU GENG 4HAO	25.3235	5.27259	-31.2234	2.2805	6.9235	3.072	11.777	1.817	5.093	2.81	10.019	1.784	4.748	2.671
			Sample72	SHEN NONG 265	21.976	2.97801	8.06411	2.2815	7.205	3.2035	11.248	1.749	4.799	2.727	10.165	1.723	4.657	2.71
			Sample73	SHEN NONG 8718	3.40998	-3.53197	4.43696	2.204	6.795	3.097	11.455	1.784	4.955	2.782	9.765	1.757	4.632	2.644
			Sample74	SHEN NONG 159	3.31336	-0.93351	-15.0219	2.132	7.053	3.334	12.006	1.68	4.932	2.942	10.211	1.66	4.646	2.81
			Sample75	KAI GENG 1HAO	22.3747	11.8184	-35.7008	2.264	7.17	3.245	12.202	1.639	4.962	3.031	10.08	1.647	4.667	2.845
			Sample76	HUN NUO 3HAO	22.7634	2.71581	-11.2229	NaN	NaN	NaN	11.997	1.638	4.869	2.975	10.316	1.642	4.615	2.818
			Sample77	LIAO YAN NUO 10HAO	26.4841	7.94208	-0.129357	NaN	NaN	NaN	10.979	1.672	4.71	2.825	9.449	1.624	4.378	2.708
			Sample78	FU GENG 3HAO	26.262	4.53394	-29.3796	2.143	7.0365	3.302	11.677	1.708	4.922	2.893	10.119	1.68	4.665	2.79
			Sample79	SHEN NONG 8801	-5.01315	10.5322	2.48111	2.135	7.106	3.3465	12.746	1.74	5.191	2.985	10.957	1.705	4.875	2.865
			Sample80	LIAO YAN 9HAO	27.3362	9.21081	-0.276351	2.2675	7.0045	3.0925	11.386	1.791	4.953	2.771	9.76	1.74	4.618	2.665
			Sample81	YING 8433	-25.5919	21.9811	-2.48714	2.3355	7.183	3.0975	NaN	NaN	NaN	NaN	NaN	NaN	NaN	NaN
			Sample82	SHEN NONG XIANG NUO 1HAO	23.4237	2.5873	-5.37405	NaN	NaN	NaN	11.644	1.999	5.28	2.646	10.017	1.952	4.922	2.529
			Sample83	SHEN NUO 1HAO	25.9903	5.17337	-6.30635	NaN	NaN	NaN	12.93	1.886	5.422	2.881	10.773	1.848	5.044	2.736
			Sample84	LIAO GENG 454	-8.55529	-11.655	17.0184	2.26	7.1655	3.178	12.12	1.815	5.147	2.841	NaN	NaN	NaN	NaN
			Sample85	SHEN NONG 90-17	25.7394	10.2591	-1.53219	2.347	7.436	3.1835	NaN	NaN	NaN	NaN	NaN	NaN	NaN	NaN
			Sample86	SHEN NONG 87-913	9.61414	2.87442	-16.8024	NaN	NaN	NaN	13.208	1.567	4.997	3.189	11.424	1.554	4.746	3.063
			Sample87	KANG YAN 100	1.05583	0.900132	-57.9492	2.2325	7.015	3.1035	13.461	1.87	5.539	2.964	10.891	1.809	5.089	2.818
			Sample88	LIAO XUAN 180	24.0007	7.71881	1.5712	2.1815	6.846	3.171	11.477	1.722	4.881	2.84	9.749	1.674	4.546	2.728
			Sample89	SHEN DONG 1HAO	24.7826	3.59258	-1.90593	2.21	6.925	3.152	11.92	1.792	5.089	2.844	9.567	1.742	4.649	2.679
			Sample90	TIE GENG 5HAO	-10.9626	1.45591	-29.5713	2.3285	6.833	2.9255	NaN	NaN	NaN	NaN	NaN	NaN	NaN	NaN
			Sample91	DAN GENG 4HAO	14.6	12.87	-5.33354	2.276	6.953	3.053	NaN	NaN	NaN	NaN	NaN	NaN	NaN	NaN
			Sample92	TIE GENG 4HAO	8.49276	10.5395	-1.84235	2.37	7.016	3.013	NaN	NaN	NaN	NaN	NaN	NaN	NaN	NaN
			Sample93	HAN 58	18.233	1.35159	0.0421121	2.101	6.792	3.238	10.983	1.636	4.655	2.853	9.643	1.587	4.37	2.761
			Sample94	XING GENG 2HAO	-11.8633	-25.3576	-8.64281	2.4975	7.4995	3.0205	12.289	1.962	5.384	2.751	10.932	1.955	5.168	2.653
			Sample95	LIAO KAI 79	-8.3344	-11.5313	16.895	2.3565	7.187	3.0785	11.924	1.833	5.124	2.798	10.342	1.807	4.845	2.693
			Sample96	SHEN NONG 91	27.329	7.68663	0.073376	2.14	6.807	3.258	11.997	1.638	4.869	2.975	10.316	1.642	4.615	2.818
			Sample97	HAN 152	18.2981	1.42102	0.0228809	2.1655	6.8355	3.1995	10.979	1.672	4.71	2.825	9.449	1.624	4.378	2.708
			Sample98	YING FENG 1HAO	-45.7744	49.4388	11.4061	2.2185	7.2235	3.269	12.221	1.81	5.182	2.871	10.461	1.766	4.872	2.768
			Sample99	LIAO GENG 287	23.2498	8.39165	18.9071	2.2085	6.97	3.1815	11.538	1.844	5.103	2.778	10.169	1.761	4.745	2.706
			Sample100	FU GENG 2HAO	26.5159	10.8368	-3.66211	2.0215	6.61	3.3035	NaN	NaN	NaN	NaN	NaN	NaN	NaN	NaN
			Sample101	TIE GENG 2HAO	21.0151	-0.940051	-5.25352	2.1815	6.931	3.202	12.362	1.719	5.063	2.951	10.543	1.707	4.773	2.802
			Sample102	DAN GENG 1HAO	25.4212	7.85082	-3.57214	2.2465	7.093	3.191	12.647	1.783	5.245	2.945	10.389	1.759	4.814	2.75
			Sample103	LIAO NUO 1HAO	28.6399	12.459	19.7826	2.349	7.1065	3.0455	11.802	1.807	5.103	2.827	10.108	1.824	4.821	2.649
			Sample104	YING CHUN 2HAO	24.594	3.68277	-1.88891	2.277	7.2935	3.2215	12.437	1.852	5.286	2.861	10.594	1.802	4.918	2.738
			Sample105	LIAO GENG 6HAO	23.9459	3.80422	-4.04896	2.1975	6.962	3.1795	11.729	1.746	4.963	2.846	10.297	1.748	4.779	2.747
			Sample106	BEI GENG 1702	-16.9025	-24.1275	16.0862	2.3665	7.3335	3.137	12.356	1.859	5.287	2.849	11.098	1.834	5.002	2.736
			Sample107	LIAO GENG 1402	-5.09958	-6.72022	36.514	2.4735	7.307	2.9715	11.582	1.987	5.257	2.65	10.11	1.969	4.994	2.553
			Sample108	BEI GENG 1501	-0.915486	-3.41693	24.5311	2.1805	7.1115	3.317	12.679	1.668	5.09	3.053	11.123	1.628	4.733	2.913
			Sample109	LIAO GENG 168	-16.8749	-26.3396	26.9438	2.5525	7.307	2.962	11.632	1.919	5.241	2.734	10.405	1.852	4.902	2.652
			Sample110	TIE GENG 16	29.1473	10.4986	26.2008	2.325	6.9545	3.0285	11.707	1.829	5.111	2.796	10.023	1.804	4.759	2.643
			Sample111	TIE GENG 15	-42.0087	33.7844	22.8724	2.164	7.0105	3.2655	11.854	1.814	5.06	2.805	10.687	1.717	4.784	2.791
			Sample112	DAN GENG 20	-12.3031	-7.03826	31.5468	2.2545	7.2085	3.258	12.982	1.743	5.223	3	11.256	1.737	4.943	2.851
			Sample113	YAN GENG 927	-41.534	39.0623	-2.13337	2.171	7.1405	3.2985	12.997	1.748	5.248	3.005	10.86	1.751	4.905	2.81
			Sample114	BEI GENG 1HAO	1.78403	-1.26982	31.3514	2.2195	6.9805	3.171	12.032	1.741	5.043	2.898	10.35	1.715	4.697	2.743
			Sample115	LIAO GENG 399	3.27333	-0.64786	7.3364	2.599	8.133	3.136	13.059	2.18	5.881	2.701	11.894	2.158	5.648	2.626
			Sample116	DAN GENG 18	-54.0321	37.2651	-4.96967	2.0215	6.61	3.3035	11.736	1.594	4.759	2.99	10.206	1.548	4.467	2.891
			Sample117	YAN GENG 939	-26.594	23.4767	23.3967	2.3265	6.9105	2.999	11.124	1.785	4.872	2.733	9.261	1.786	4.557	2.563
			Sample118	DAN GENG 17HAO	-14.3592	-29.5606	1.22035	2.577	7.5835	2.99	13.078	1.985	5.583	2.814	11.33	1.941	5.227	2.701
			Sample119	SU GENG 2HAO	24.8645	9.58176	-2.92878	1.837	6.336	3.498	11.426	1.475	4.526	3.072	9.643	1.465	4.259	2.919
			Sample120	YAN GENG NUO 66	-4.79072	-3.63012	30.1737	2.227	7.038	3.1735	NaN	NaN	NaN	NaN	NaN	NaN	NaN	NaN
			Sample121	SHEN NONG 511	24.087	8.16141	-1.1697	2.2235	7.096	3.263	12.276	1.685	4.988	2.967	10.394	1.659	4.652	2.817
			Sample122	YAN GENG NUO 30	-3.3997	-5.19554	33.1711	2.1565	7.016	3.3145	NaN	NaN	NaN	NaN	NaN	NaN	NaN	NaN
			Sample123	FU HE DAO 255	-31.2205	-42.5247	10.1747	2.6645	7.556	2.8655	11.694	2.072	5.392	2.608	9.833	2.031	5.012	2.478
			Sample124	MEI FENG DAO 271	9.09104	-0.2763	-24.1059	2.967	7.4775	2.5395	10.159	2.338	5.347	2.289	9.026	2.33	5.093	2.208
			Sample125	FU HE DAO 273	-1.01993	-1.38492	3.1731	2.8215	7.8335	2.789	11.181	2.316	5.574	2.412	10.29	2.264	5.376	2.382
			Sample126	FU HE DAO 258	-3.05587	-3.75331	11.7229	2.4075	7.268	3.0425	10.217	1.936	4.762	2.522	9.967	1.848	4.813	2.611
			Sample127	YUAN GENG 2HAO	4.00848	0.242436	-29.6191	2.148	6.8855	3.2405	11.398	1.663	4.804	2.896	9.89	1.618	4.498	2.788
			Sample128	FU HE DAO 275	-6.47639	-18.4703	-3.2223	2.5495	7.383	2.93	NaN	NaN	NaN	NaN	NaN	NaN	NaN	NaN
			Sample129	MEI FENG DAO 245	3.96557	9.56442	1.57599	2.3965	7.034	2.953	11.398	1.889	5.107	2.707	9.762	1.862	4.793	2.581
			Sample130	MEI FENG DAO 225	-7.89162	-3.90729	33.6523	2.5825	7.388	2.927	12.291	1.899	5.329	2.809	10.854	1.891	5.062	2.684
			Sample131	JIN DAO 313	-54.9575	38.164	-5.97782	2.2715	7.043	3.145	12.104	1.72	5.006	2.922	10.117	1.79	4.758	2.681
			Sample132	SHEN DAO 171	1.34056	-0.878848	23.9971	2.146	6.6615	3.136	NaN	NaN	NaN	NaN	NaN	NaN	NaN	NaN
			Sample133	SHEN NONG DAO 546	-3.84373	-5.94601	37.1316	2.423	7.149	2.9875	11.683	1.86	5.144	2.772	10.03	1.864	4.84	2.608
			Sample134	YU GENG 5HAO	-7.19053	-6.61076	11.6877	2.3315	7.338	3.1615	12.516	1.807	5.232	2.899	10.425	1.786	4.843	2.722
			Sample135	FU HE DAO 9463	19.3425	-2.37192	-16.9742	2.2315	6.8005	3.072	11.186	1.744	4.886	2.804	9.817	1.721	4.61	2.685
			Sample136	MEI FENG DAO 663	-9.78896	-7.04918	23.1652	2.2135	7.5535	3.4165	13.024	1.778	5.296	2.981	11.421	1.739	5.011	2.889
			Sample137	YAN GENG 662	-17.0399	38.0036	11.2096	2.203	7.177	3.2945	12.366	1.719	5.053	2.945	10.678	1.698	4.768	2.822
			Sample138	SAN QIU DAO 1HAO	3.59156	-11.5612	-20.5318	2.3465	7.1115	3.0465	11.926	1.883	5.185	2.758	10.587	1.841	4.927	2.684
			Sample139	MEI FENG DAO 115	19.8568	1.54122	5.62445	2.412	7.201	2.997	11.362	1.949	5.179	2.663	9.706	1.926	4.874	2.542
			Sample140	MEI FENG DAO 113	0.860446	18.4146	-41.4098	2.5495	7.383	2.93	12.094	2.055	5.459	2.661	10.276	2.027	5.083	2.525
			Sample141	MEI FENG DAO 63	-34.2514	28.3866	-16.2289	2.5625	7.274	2.8645	10.695	1.929	4.992	2.59	9.126	1.948	4.751	2.456
			Sample142	FU XING DAO 39	6.70682	3.31195	-19.3565	2.2345	6.6525	2.985	10.465	1.798	4.781	2.662	9.028	1.77	4.474	2.537
			Sample143	YAN GENG 765	18.7472	1.64628	-18.5572	2.3055	6.921	3.046	11.126	1.825	4.976	2.73	9.701	1.789	4.685	2.625
			Sample144	SHENG GENG 5HAO	-3.61636	-5.80936	37.2424	2.3505	7.1185	3.056	11.583	1.855	5.096	2.752	10.098	1.797	4.764	2.658
			Sample145	BEI GENG 3HAO	1.151	-13.737	-19.7669	2.322	6.8585	3.006	10.991	1.769	4.869	2.756	9.526	1.767	4.647	2.639
			Sample146	YUAN GENG 1HAO	-12.4608	7.51691	-26.723	2.1885	7.102	3.2645	11.282	1.746	4.855	2.777	10.463	1.694	4.749	2.815
			Sample147	SHEN DAO 529	-20.9925	-39.7687	6.70053	2.8055	7.675	2.7855	12.03	2.299	5.755	2.517	10.857	2.31	5.606	2.432
			Sample148	DONG ZHUANG 086	-41.4665	37.1562	-2.52991	2.0225	6.5915	3.283	11.883	1.586	4.776	3.012	9.858	1.547	4.383	2.836
			Sample149	LIAN GENG 1HAO	0.521942	-27.7229	-9.00825	2.227	7.038	3.1735	12.141	1.809	5.144	2.847	10.9	1.771	4.886	2.765
			Sample150	LIAO GENG 390	-16.4347	-5.664	31.8558	2.3815	7.2535	3.0815	11.696	1.897	5.146	2.716	9.453	1.847	4.725	2.565
			Sample151	GANG FU 14	-4.37586	-1.96443	-4.15979	2.3305	7.224	3.114	11.825	1.875	5.221	2.79	10.445	1.849	4.994	2.708
			Sample152	YU GENG 899	-28.9672	28.0973	26.4382	2.2745	6.7455	3.02	11.265	1.764	4.904	2.782	9.771	1.753	4.589	2.629
			Sample153	YU GENG 168	-42.6636	11.2012	-32.4625	2.3435	7.216	3.096	12.748	1.955	5.462	2.795	11.136	1.905	5.162	2.713
			Sample154	QIAO KE 951	0.354145	-22.857	-22.9489	2.366	7.42	3.126	12.531	1.962	5.444	2.779	NaN	NaN	NaN	NaN
			Sample155	XING YAN 1HAO	-61.3882	21.0457	-36.8541	2.069	7.1175	3.4465	13.072	1.687	5.183	3.084	10.574	1.679	4.746	2.839
			Sample156	LIAO GENG 346	15.3054	-4.90706	6.82759	2.1965	7.0745	3.2295	11.671	1.723	4.948	2.876	10.22	1.691	4.677	2.772
			Sample157	FU HE 99	27.839	3.53346	22.3041	2.4185	7.473	3.121	12.152	1.907	5.319	2.793	10.958	1.862	5.05	2.722
			Sample158	GANG YU 2HAO	-19.3281	-41.9802	-1.46231	2.5785	7.6965	3.0275	13.039	2.073	5.686	2.746	10.759	1.919	5.167	2.697
			Sample159	TIAN FENG 202	-58.5172	41.4312	-4.22053	2.036	6.8635	3.397	12.5	1.631	4.948	3.043	10.527	1.6	4.619	2.895
			Sample160	GANG YUAN 3HAO	20.4776	6.01207	18.6223	2.0475	6.825	3.3465	12.351	1.593	4.844	3.041	10.411	1.589	4.581	2.891
			Sample161	GANG FU 1HAO	25.8571	9.53757	-3.6851	2.148	6.766	3.181	11.469	1.668	4.784	2.873	9.65	1.678	4.562	2.725
			Sample162	DAN GENG 3HAO	20.0055	13.6788	-25.7293	2.229	6.845	3.0975	11.353	1.755	4.917	2.804	9.698	1.729	4.651	2.695
			Sample163	LIAO GENG 5HAO	27.6397	7.29986	-0.803491	2.119	6.8925	3.257	11.484	1.699	4.837	2.853	10.135	1.658	4.615	2.796
			Sample164	MEI FENG DAO 251	-9.84583	-33.008	-0.221816	2.453	7.0445	2.9025	10.835	1.885	4.95	2.629	9.516	1.847	4.659	2.53
			Sample165	BEI GENG 1705	17.6399	-6.99906	0.0089376	2.2005	6.673	3.0835	11.003	1.698	4.756	2.804	9.951	1.67	4.541	2.723
			Sample166	TIE GENG 20	2.83383	-3.98368	7.63847	2.228	6.786	3.13	11.44	1.7	4.854	2.857	10.428	1.678	4.657	2.784
			Sample167	TIE GENG 17	-37.7299	-34.4881	17.6543	2.573	7.1445	2.8	11.036	1.978	5.113	2.587	9.533	1.955	4.793	2.466
			Sample168	LIAO GENG 1415	-11.0703	-31.2959	5.6992	2.758	7.822	2.8515	12.439	2.215	5.752	2.6	10.494	2.203	5.355	2.438
			Sample169	JIN DAO 108	-10.5402	-20.4339	-14.6099	2.42	7.19	3.0465	11.969	1.836	5.144	2.805	10.506	1.83	4.893	2.681
			Sample170	TIE GENG 14	-5.76632	14.8898	-39.3669	2.4905	7.2875	2.9465	11.952	2.056	5.431	2.645	10.802	2.008	5.184	2.585
			Sample171	LIAO GENG 212	-35.968	-45.5621	7.47793	2.5185	7.466	2.9935	12.042	2.005	5.382	2.691	10.575	1.964	5.077	2.594
			Sample172	GANG YU 6HAO	-21.8385	-42.5138	-0.585858	2.547	7.27	2.8925	11.864	2.015	5.364	2.666	10.63	1.951	5.078	2.609
			Sample173	TIE GENG 11HAO	-34.997	-44.4007	8.7364	2.446	7.2085	2.9555	11.181	1.967	5.143	2.623	10.184	1.911	4.91	2.579
			Sample174	MEI FENG 1158	2.6174	-9.4351	-6.52958	2.352	7.186	3.0755	11.555	1.894	5.136	2.718	10.514	1.851	4.875	2.647
			Sample175	LIAO GENG 101	-35.0192	-44.5708	7.73281	2.5615	7.417	2.929	11.789	2.002	5.331	2.666	10.479	1.99	5.063	2.554
			Sample176	QIAO YU 8	4.5264	30.7149	-8.01231	2.2185	7.088	3.2445	10.739	1.794	4.675	2.657	10.374	1.673	4.715	2.826
			Sample177	YAN GENG 456	-22.0785	25.0623	23.3029	2.1165	6.7595	3.2205	11.289	1.639	4.684	2.838	10.189	1.659	4.608	2.795
			Sample178	SHEN DAO 47	-3.12545	-7.9919	7.87207	2.275	7.3175	3.236	12.51	1.773	5.199	2.938	10.656	1.744	4.875	2.803
			Sample179	FU XING 90	15.4346	3.123	-21.3586	2.1475	6.5655	3.103	10.51	1.677	4.645	2.774	9.112	1.641	4.356	2.662
			Sample180	FU GENG 8HAO	16.2165	5.58244	-34.1828	2.338	6.905	2.982	NaN	NaN	NaN	NaN	NaN	NaN	NaN	NaN
			Sample181	GANG YU 129	2.36165	0.565135	9.76719	2.727	7.2395	2.664	11.03	2.16	5.358	2.484	10.809	2.3	7.97	3.895
			Sample182	YAN GENG 218	-28.1283	27.1036	26.5487	2.261	6.9665	3.1295	11.64	1.733	4.944	2.857	9.829	1.705	4.566	2.685
			Sample183	YING YAN 3HAO	-42.089	9.62749	-26.9186	2.4845	7.476	3.023	11.663	1.956	5.267	2.694	10.067	1.937	4.991	2.581
			Sample184	CHEN HE 168	-54.1829	45.0056	-5.21446	2.1065	6.8695	3.3035	11.81	1.631	4.849	2.977	9.99	1.611	4.546	2.832
			Sample185	SHEN NONG 9903	-21.7346	-42.4327	-0.510423	2.5175	7.387	2.96	12.579	1.987	5.461	2.75	10.961	1.929	5.126	2.662
			Sample186	SHEN DAO 29	28.6915	10.4896	26.4535	2.2615	7.069	3.151	11.687	1.825	5.094	2.794	10.127	1.775	4.741	2.677
			Sample187	HUA DAN 998	26.4982	-4.8598	-37.5306	NaN	NaN	NaN	12.7	1.906	5.43	2.852	10.654	1.87	5.075	2.723
			Sample188	JIN DAO 106	13.2561	4.35012	-7.11606	2.623	7.2985	2.7945	10.9	2.076	5.251	2.53	9.306	2.087	4.939	2.38
			Sample189	MEI FENG 1HAO	9.64945	-12.5531	-21.5077	2.34	7.15	3.1015	11.966	1.843	5.145	2.797	10.218	1.804	4.812	2.675
			Sample190	ZHUANG YAN 5HAO	15.1317	6.51619	-4.35675	2.1995	7.277	3.3275	12.808	1.744	5.208	2.989	11.182	1.719	4.932	2.875
			Sample191	SHEN NONG 9816	1.17035	-13.8045	-19.3606	2.2375	6.823	3.057	10.877	1.775	4.842	2.731	9.433	1.76	4.574	2.606
			Sample192	LIAO XING 18HAO	20.4244	2.70345	-23.5623	2.2755	7.318	3.2405	12.196	1.854	5.238	2.831	10.582	1.787	4.91	2.758
			Sample193	JIN DAO 104	-59.4928	42.314	-4.37644	2.093	6.8885	3.374	12.689	1.576	4.901	3.118	10.328	1.566	4.536	2.908
			Sample194	XIANG YU 3HAO	-31.9974	19.6955	-6.86757	2.573	7.525	2.958	12.293	2.064	5.464	2.654	10.964	2.007	5.216	2.606
			Sample195	DAN 137	23.014	-3.18782	-25.5781	2.1565	7.016	3.3145	12.477	1.659	4.975	3.001	10.427	1.666	4.693	2.823
			Sample196	GANG YU 10HAO	-20.8124	-40.0364	0.091925	2.491	7.3715	2.98	11.945	2.017	5.371	2.668	10.804	1.922	5.083	2.653
			Sample197	LIAO HE 5HAO	-58.6097	41.7869	-3.77916	2.145	6.98	3.296	12.478	1.645	4.999	3.04	10.811	1.665	4.735	2.85
			Sample198	FU GENG 2103	-35.5305	-45.3171	7.92294	2.482	7.363	2.988	11.745	1.969	5.276	2.685	9.964	1.955	4.922	2.529
			Sample199	SHEN 191	18.1393	-10.4439	-22.42	2.317	6.8975	2.9965	11.958	1.784	5.088	2.852	10.448	1.786	4.836	2.717
			Sample200	SHEN DAO 10HAO	6.84216	2.96343	5.41419	2.409	7.2685	3.0475	12.211	1.863	5.224	2.808	10.274	1.832	4.882	2.674
			Sample201	SHEN NONG 014	1.40051	-13.099	-19.4862	2.3065	6.9725	3.037	10.902	1.801	4.881	2.715	9.284	1.787	4.616	2.597
			Sample202	FU HE 90	17.6427	-11.4221	-23.8515	2.267	7.0025	3.1305	11.256	1.742	4.869	2.8	9.7	1.704	4.672	2.752
			Sample203	MIN XI 9HAO	-37.3989	10.0024	-10.3513	2.3725	7.286	3.075	12.816	1.88	5.348	2.847	11.058	1.856	5.098	2.758
			Sample204	DAN GENG 10HAO	19.9253	-1.39178	-25.0136	2.2095	7.078	3.2125	11.648	1.709	4.888	2.863	10.433	1.717	4.76	2.787
			Sample205	SHEN DAO 9HAO	30.038	10.0583	26.5937	2.2095	7.2525	3.31	12.54	1.775	5.185	2.926	11.147	1.711	4.883	2.862
			Sample206	YAN GENG 98	-29.3862	-32.6058	8.71882	2.443	7.381	3.031	11.971	1.955	5.294	2.712	10.461	1.92	4.959	2.59
			Sample207	QIAN ZHONG LANG 1HAO	21.5513	4.00192	6.13359	2.373	7.289	3.089	12.122	1.87	5.226	2.798	10.316	1.801	4.804	2.673
			Sample208	ZHONG DAN 4HAO	16.1491	0.356044	-11.7423	2.1205	6.882	3.27	12.136	1.68	4.962	2.956	10.031	1.666	4.658	2.806
			Sample209	XIANG FENG 00-93	-29.5789	-45.588	-28.9836	2.4995	7.4045	3.0075	11.746	1.962	5.277	2.699	10.187	1.893	4.919	2.611
			Sample210	LIAO YAN 166	-4.54879	-34.0398	-16.3307	2.6145	7.4715	2.8805	11.6	2.088	5.385	2.582	9.584	1.995	4.931	2.479
			Sample211	LIAO XING 6HAO	-5.81019	-1.12524	11.0598	2.443	7.5915	3.1155	NaN	NaN	NaN	NaN	NaN	NaN	NaN	NaN
			Sample212	LIAO XING 5HAO	23.0218	0.526003	4.34109	2.2245	7.1155	3.21	12.57	1.767	5.172	2.929	10.461	1.732	4.776	2.764
			Sample213	FENG MIN 2102	15.4417	-14.7841	-33.3727	2.2685	7.1865	3.1805	12.058	1.837	5.189	2.835	10.243	1.752	4.85	2.777
			Sample214	SHEN NONG 604	-7.91813	-0.384681	12.0252	2.2235	7.2665	3.301	13.04	1.749	5.264	3.013	11.081	1.711	4.863	2.85
			Sample215	LIAO XING 1HAO	-35.8136	-45.3444	7.83781	2.5585	7.4655	2.9725	12.05	1.982	5.369	2.715	10.402	1.976	5.047	2.566
			Sample216	LIAO GENG 29	-35.7852	-45.3969	7.77665	2.627	7.7815	2.985	12.971	2.194	5.86	2.672	11.31	2.12	5.486	2.593
			Sample217	YAN GENG 34	9.32358	-5.47154	6.89102	2.2335	7.094	3.2065	11.543	1.798	5.022	2.795	10.252	1.753	4.725	2.705
			Sample218	SHEN NONG 016	15.3743	4.11065	5.09561	2.43	7.355	3.0355	11.692	1.964	5.277	2.691	10.497	1.88	4.961	2.644
			Sample219	SHEN DAO 3HAO	28.6899	10.4896	26.2781	2.2495	7.0685	3.1795	12.141	1.806	5.144	2.853	10.778	1.758	4.848	2.764
			Sample220	SHEN DAO 6HAO	29.2699	10.794	26.1087	2.187	7.046	3.2295	12.185	1.717	5.019	2.925	10.589	1.709	4.753	2.786
			Sample221	LIAO GENG 912	28.4969	8.61681	26.3163	2.2875	7.2095	3.1955	12.245	1.765	5.138	2.913	11	1.771	4.912	2.784
			Sample222	FU 105	23.3516	6.50268	-3.0441	2.273	7.2645	3.219	12.8	1.783	5.245	2.944	10.973	1.773	4.949	2.801
			Sample223	DAN GENG 11	23.2098	5.1502	-26.3588	2.2005	6.748	3.114	11.481	1.699	4.882	2.877	9.796	1.679	4.602	2.75
			Sample224	FU HE 5HAO	8.8879	-14.4023	-20.0472	2.297	7.1645	3.1535	11.806	1.759	5.026	2.86	9.801	1.708	4.688	2.753
			Sample225	YAN GENG 68	-56.6584	40.5197	-4.01812	2.119	6.7435	3.1955	11.881	1.698	4.915	2.896	10.104	1.651	4.583	2.784
			Sample226	LIAO GENG 28	4.77638	-20.1148	-1.086	2.271	6.772	3.0445	11.435	1.748	4.902	2.809	10.421	1.721	4.718	2.747
			Sample227	LIAO GENG 9HAO	-4.96368	-6.14162	37.0073	2.4515	7.138	2.953	11.667	1.94	5.223	2.696	10.191	1.896	4.908	2.596
			Sample228	SHEN DAO 5HAO	-3.11984	-1.21728	3.74566	2.4765	7.6425	3.1015	12.837	1.994	5.574	2.798	11.492	1.975	5.283	2.679
			Sample229	SHEN DAO 4HAO	-7.85777	28.5059	-6.38674	2.238	6.9255	3.111	11.621	1.789	5.017	2.809	10.081	1.761	4.73	2.693
			Sample230	SHEN NONG 9741	-5.68567	-4.18932	13.0137	2.335	6.872	2.972	10.637	1.783	4.768	2.669	9.138	1.757	4.476	2.554
			Sample231	SHEN NONG 702	27.4036	8.42486	1.47777	2.249	6.934	3.1275	12.119	1.755	5.094	2.905	10.344	1.701	4.688	2.762
			Sample232	HUA GENG 15	25.246	-13.8648	-38.7035	2.085	6.3445	3.056	9.891	1.659	4.411	2.669	8.695	1.587	4.215	2.663
			Sample233	LIAO GENG 92-34	8.1583	-7.3413	0.939453	2.6685	7.4125	2.8085	11.057	2.107	5.329	2.534	9.501	2.066	4.99	2.423
			Sample234	LIAO GENG 534	-0.221253	1.52478	-13.1674	2.331	7.398	3.1775	12.212	1.948	5.324	2.741	10.629	1.898	5.029	2.662
			Sample235	KAI GENG 3HAO	27.0512	9.35047	5.01842	2.2385	6.949	3.105	11.848	1.801	5.095	2.834	9.666	1.777	4.746	2.684
			Sample236	SHEN NONG 315	22.0219	-0.241461	-3.71935	2.285	7.2045	3.1855	12.052	1.803	5.102	2.834	10.384	1.772	4.819	2.732
			Sample237	LIAO NONG 979	0.0387795	-15.6444	-1.99995	2.271	7.2195	3.1875	12.763	1.819	5.295	2.913	11.21	1.798	5.009	2.793
			Sample238	LIAO GENG 931	-8.18535	-12.0247	15.7892	2.336	7.074	3.044	11.336	1.863	5.043	2.711	9.848	1.813	4.735	2.622
			Sample239	DAN NUO 2HAO	26.5539	8.03142	-0.907067	NaN	NaN	NaN	12.7	1.906	5.43	2.852	10.654	1.87	5.075	2.723
			Sample240	LIAO NONG 968	24.2903	7.05328	-28.5719	2.134	6.9445	3.3335	12.444	1.593	4.908	3.084	10.966	1.567	4.626	2.957
			Sample241	LIAO GENG 288	28.8626	11.0123	25.852	2.202	6.865	3.144	11.793	1.725	4.972	2.884	10.341	1.731	4.778	2.77
			Sample242	LIAO GENG 371	9.35349	0.654087	-1.61426	2.234	7.0675	3.2105	12.315	1.787	5.155	2.891	10.488	1.752	4.82	2.761
			Sample243	KAI GENG 2HAO	17.6759	1.39474	2.35753	2.212	7.1485	3.3075	12.475	1.686	5.046	3	10.45	1.676	4.721	2.828
			Sample244	ZHONG LIAO 9052	-19.8028	-44.6197	-2.83411	2.4625	7.56	3.103	13.003	1.94	5.494	2.838	11.035	1.874	5.131	2.744
			Sample245	LIAO YOU 7HAO	28.8823	10.6098	25.9606	2.331	7.225	3.1265	12.086	1.862	5.233	2.814	10.248	1.822	4.868	2.681
			Sample246	YAN GENG 48	27.8672	9.79916	-1.61062	2.2155	7.308	3.299	12.758	1.758	5.211	2.966	11.166	1.759	4.979	2.838
			Sample247	DAN GENG 8HAO	18.3883	3.31348	-27.0223	2.3065	7.2585	3.2175	NaN	NaN	NaN	NaN	NaN	NaN	NaN	NaN
			Sample248	LIAO GENG 135	-8.28531	-11.5152	16.8536	2.292	7.2265	3.169	12.152	1.793	5.136	2.868	9.931	1.798	4.747	2.656
			Sample249	LIAO NONG 938	11.9724	0.545982	-5.22874	2.1135	6.805	3.2685	11.98	1.651	4.884	2.964	10.003	1.699	4.63	2.745
			Sample250	LIAO YAN 12HAO	-22.0784	-7.68654	-25.64	2.281	7.2245	3.181	NaN	NaN	NaN	NaN	NaN	NaN	NaN	NaN
			Sample251	LIAO GENG 207	23.1035	6.5732	22.3043	2.26	7.0225	3.158	11.995	1.809	5.125	2.836	10.509	1.773	4.843	2.736
			Sample252	LIAO GENG 294	27.8547	10.6539	26.2644	2.327	7.261	3.129	11.973	1.86	5.205	2.803	10.352	1.838	4.882	2.665
			Sample253	DONG XUAN 2HAO	-2.45821	16.2959	2.21549	2.237	7.2525	3.282	12.53	1.786	5.162	2.901	10.973	1.749	4.947	2.843
			Sample254	HUA GENG 45	29.3163	12.7476	18.1916	2.047	6.706	3.2895	11.463	1.633	4.778	2.932	9.978	1.6	4.511	2.833
			Sample255	SHEN NONG 514	-8.59237	-11.6075	16.7585	2.2115	7.041	3.23	12.139	1.705	5.02	2.947	10.55	1.676	4.708	2.815
			Sample256	LIAO GENG 244	-3.64361	-32.6972	-16.0963	2.5725	7.482	2.916	11.217	2.125	5.359	2.527	9.891	2.008	4.989	2.497
			Sample257	SHEN NONG 611	25.5329	4.85345	5.06657	2.1465	7.068	3.3145	12.143	1.7	4.969	2.913	11.046	1.681	4.813	2.872
			Sample258	LIAO YAN 16	-43.5248	43.0349	-10.8662	2.2175	7.325	3.2985	13.538	1.838	5.538	3.016	11.719	1.819	5.187	2.861
			Sample259	LIAO YAN 283	-43.5286	43.6334	-11.054	2.174	7.1505	3.296	12.746	1.782	5.283	2.967	10.65	1.763	4.919	2.796
			Sample260	LIAO YAN 241	3.43102	7.61874	-5.5997	2.3395	7.3315	3.161	12.7	1.906	5.43	2.852	10.654	1.87	5.075	2.723
			Sample261	LIAO GENG 326	25.295	3.56639	3.50789	2.071	6.811	3.3295	11.976	1.631	4.811	2.955	10.638	1.63	4.631	2.86
			Sample262	SHEN NONG 129	26.9166	9.95278	-2.71655	2.2395	6.981	3.117	11.286	1.803	4.984	2.771	9.824	1.743	4.703	2.708
			Sample263	LIAO YAN 282	-18.6259	41.8756	8.17004	2.4745	7.341	2.983	11.822	1.988	5.341	2.693	10.84	1.935	5.143	2.665
			Sample264	LIAO YAN 2HAO	-38.7963	45.4817	13.4643	2.208	7.1595	3.277	11.075	1.766	4.815	2.731	10.695	1.75	4.936	2.831
			Sample265	LIAO GENG 421	22.1232	11.7541	-35.3941	2.1915	7.292	3.3975	12.394	1.662	5.04	3.037	10.401	1.639	4.717	2.892
			Sample266	HAN 72	25.7141	9.56522	2.50899	2.185	7.248	3.3315	12.294	1.687	5.029	2.981	10.878	1.674	4.812	2.883
			Sample267	YAN GENG 1HAO	19.7001	2.12907	-1.2125	2.0895	6.931	3.3245	11.774	1.627	4.803	2.96	10.467	1.617	4.6	2.856
			Sample268	LIAO GENG 10HAO	26.4791	8.47488	-2.63231	2.146	6.6615	3.136	11.45	1.713	4.873	2.847	9.826	1.733	4.654	2.698
			Sample269	FU GENG 1HAO	16.3304	5.55989	-2.75359	2.18	7.081	3.251	12.516	1.753	5.166	2.95	10.807	1.748	4.884	2.804
			Sample270	LIAO GENG 8HAO	21.9391	5.57776	-3.53999	2.1505	6.737	3.1335	11.683	1.722	4.944	2.883	10.335	1.694	4.695	2.781
			Sample271	ZHONG DAN 1HAO	25.8766	5.90084	-3.96842	2.281	7.2245	3.181	11.876	1.839	5.138	2.799	10.456	1.789	4.918	2.755
			Sample272	GONG ZI 1HAO	25.9311	5.72168	-4.03567	2.0685	6.8025	3.346	11.834	1.592	4.811	3.027	10.127	1.567	4.5	2.882
			Sample273	FENG JIN	25.8169	8.61642	-0.0325671	2.218	6.9465	3.151	10.457	1.737	4.623	2.664	10.47	1.71	4.719	2.765
			Sample274	YAN GENG RUAN YU 11	4.35981	2.73239	29.5337	2.3695	7.279	3.14	12.473	1.796	5.211	2.904	10.659	1.795	4.875	2.728
			Sample275	YAN GENG RUAN YU 13	-11.0933	-24.1542	20.036	2.4985	7.276	2.943	11.358	1.971	5.201	2.642	9.844	1.894	4.802	2.543
			Sample276	YAN GENG 219	-28.7738	26.8199	25.8412	2.327	6.8185	2.962	10.436	1.797	4.752	2.648	8.944	1.778	4.491	2.539
			Sample277	YAN GENG 313	-10.7795	-13.9948	-7.82988	2.3065	7.2585	3.2175	13.037	1.784	5.297	2.971	11.273	1.749	4.933	2.838
			Sample278	TIAN YU DAO 2HAO	-53.2456	40.6598	-7.48009	2.032	6.8805	3.4005	12.156	1.638	4.89	2.988	10.469	1.611	4.651	2.893
			Sample279	YU GENG XIANG 1HAO	17.4509	10.8813	22.1386	2.509	7.434	2.969	12.272	2.015	5.447	2.704	9.975	2.034	5.106	2.525
			Sample280	JIA CHANG DAO 6HAO	-42.3234	4.0256	-47.2397	2.247	7.2315	3.231	11.931	1.761	5.034	2.86	10.198	1.786	4.794	2.695
