# Supplementary material for: Genome-wide association study reveals the advantaged genes regulating japonica rice grain shape traits in northern China
Source: PeerJ. 2024 Dec 18;12:e18746. doi: 10.7717/peerj.18746 (PMC11662900; doi:10.7717/peerj.18746)
Supplement: Supplemental Information 3 [file peerj-12-18746-s003.xlsx]

## Sheet: Table S2
				Chr	Start (bp)	End (bp)	Size (Mb)	Count	Average spacing (kb)
				1	37023	43170200	43.2688	4283	10.1
				2	5417	35882696	35.9357	3209	11.2
				3	99179	36400658	36.4124	3309	11
				4	90133	35458123	35.5005	2893	12.3
				5	65465	29754410	29.9353	2586	11.6
				6	219326	31069353	31.246	2872	10.9
				7	20400	29635982	29.6959	2563	11.6
				8	20253	28394788	28.4377	2339	12.2
				9	39275	22855199	22.903	1986	11.5
				10	148990	23195440	23.1907	2058	11.3
				11	155181	28985666	29.0167	2926	9.9
				12	106198	27519646	27.5166	2555	10.8
